# Supplementary material
Source: Springer Nature journal article supplement (https://www.springermedizin.de/resource/supplementary/13012_2009_171_MOESM2_ESM.pdf/9629402)
Supplement: MOESM2 [file 9629402]

**n = 105 practices**  
(1) Core CRT = 75 practices  
(2) Confidence questionnaire = 30 practices

**N= 4 practices**  
In-depth process  
evaluation

*Randomisation at practice level at start of year 1*

*Purposive sample*

**Usual practice**  
n = 35 practices  
(1) Core CRT = 25  
(2) Questionnaire = 10

**Guidelines + prompts**  
n = 35 practices  
1) Core CRT = 25  
(2) Questionnaire = 10

**Audit-based education**  
n = 35 practices  
1) Core CRT = 25  
(2) Questionnaire = 10

**Guidelines + prompts**  
N = 2 practices  
Process data only

**Audit based education**  
N = 2 practices  
Process data only
